# Supplementary material for: CMTM Family Genes Affect Prognosis and Modulate Immunocytes Infiltration in Grade II/III Glioma Patients by Influencing the Tumor Immune Landscape and Activating Associated Immunosuppressing Pathways
Source: Frontiers journal article supplement (doi:10.3389/fcell.2022.740822), 2022-02-17

**Supplement Figure 1. Real-time quantitative PCR of CMTM family.**

**Real-time quantitative PCR of CMTM3, CMTM6, CMTM7, CMTM8 and CKLF. N=3. NS: no significance \* $p < 0.05$ . by the one way ANOVA test.**

**Supplement Figure 2. Different risk signatures of immune micro-environment in consensus clustering subgroups from training and validation cohorts**

**(A) Tumor purity in cluster 1 and cluster 2 from training and validation cohorts. (B) ESTIMATE score in cluster 1 and cluster 2 from training and validation cohorts. (C) Stromal score in cluster 1 and cluster 2 from training and validation cohorts. (D) Immune score in cluster 1 and cluster 2 from training and validation cohorts. \*\*\* $p < 0.001$ ; by the Wilcox test.**

**Supplement Figure 3. Immune cells infiltration in cluster 1 and cluster 2 from CGGA325 database**

**(A-C) CIBERSORT algorithm shows infiltrated immune cells in cluster 1 and cluster 2 from the TCGA (A), CGGA301 (B) and CGGA325 (C) database. \* $p < 0.05$ , \*\* $p < 0.01$ , \*\*\* $p < 0.001$ , ns:no significant differences; by the Wilcox test.**

**Supplement Figure 4. Enriched pathways between cluster 1 and cluster 2 in CGGA325 database**

**(A) Enriched pathways between cluster 1 and cluster 2 based on KEGG-based GSEA analysis in the CGGA325 database. (B) Enriched pathways between cluster 1 and cluster 2 based on GO-based GSEA analysis in the CGGA325 database. (C) Enriched pathways between cluster 1 and cluster 2 based on GO-based GSVA analysis in the CGGA325 database.**

**Supplement Figure 5. Validation cohorts of GSE108474 databases.**

**(A) The CMTM expression in samples from GSE108474 and their corresponding clinical characteristic. Overall survival analysis based on the cluster model (B) and the scoring model (C).**

**Supplement Figure 6. The relationship between risk score and clinicopathologic features of LGG from training and validation cohorts**

**(A) Risk score among different IDH subtypes of LGG from the training and validation cohorts. (B) Risk score in LGG patients with different status of 1p/19q from the training and validation cohorts. (C) Risk score in LGG patients with different grades from the training and validation cohorts. (D) Risk score in LGG patients with different status of IDH from the training and validation cohorts. (E) Risk score in LGG patients with different status of MGMT from the training and validation cohorts. \*\*\* $p < 0.001$ , ns: no significant differences; by the Wilcoxon test.**

**Supplement Figure 7. Enriched pathways between low and high risk groups in CGGA325 database**

**(A) Enriched pathways between low-risk and high-risk groups based on KEGG-based GSEA analysis in the CGGA325 database. (B) Enriched pathways between low-risk and high-risk groups based on GO-based GSEA analysis in the CGGA325 database. (C) Enriched pathways between low-risk and high-risk groups based on KEGG-based GSVA analysis in the CGGA325 database. (D) Enriched pathways between low-risk and high-risk groups based on GO-based GSVA analysis in the CGGA325 database.**

|                                                           | TCGA         | CGGA-seq   | CGGA-array | GSE108474  |
|-----------------------------------------------------------|--------------|------------|------------|------------|
| The number of samples                                     | 508          | 142        | 155        | 168        |
| Grade<br>(Grade II, Grade III)                            | 247, 260     | 93,49      | 111, 44    | 86, 82     |
| Gender<br>(Female, Male)                                  | 225, 283     | 55, 87     | 63, 92     | /          |
| IDH<br>(Mutational, wildtype)                             | 411, 94      | 104, 38    | 99, 54     | /          |
| 1p19q<br>(codel. noncodel)                                | 168. 340     | 54, 88     | 14, 23     | /          |
| MGMT<br>(Methylated, Unmethylated)                        | 419.89       | 65, 65     | 37, 105    | /          |
| GlioVis subtype<br>(IDHmut-codel, IDHmut-noncodel, IDHwt) | 190, 240, 78 | 63, 67, 12 | 50, 96, 9  | 37, 131, 0 |

**Supplementary Table 1** | Description of samples from TCGA, CGGA-seq, CGGA-array database.

|         | TCGA           |       |                  |       | CGGA-seq       |       |                  |       | CGGA-array     |       |                  |       | GSE108474      |       |                  |       |
|---------|----------------|-------|------------------|-------|----------------|-------|------------------|-------|----------------|-------|------------------|-------|----------------|-------|------------------|-------|
|         | Univariate Cox |       | Multivariate Cox |       | Univariate Cox |       | Multivariate Cox |       | Univariate Cox |       | Multivariate Cox |       | Univariate Cox |       | Multivariate Cox |       |
|         | P value        | HR    | P value          | HR    | P value        | HR    | P value          | HR    | P value        | HR    | P value          | HR    | P value        | HR    | P value          | HR    |
| Cluster | <0.001         | 3.375 | 0.097            | 0.623 | <0.001         | 2.978 | 0.642            | 0.849 | 0.332          | 1.883 | 0.187            | 0.285 | <0.001         | 1.879 | 0.362            | 1.209 |
| Grade   | <0.001         | 3.368 | 0.3              | 1.286 | <0.001         | 3.018 | <0.001           | 2.724 | 0.14           | 2.183 | 0.218            | 3.072 | 0.13           | 1.291 | 0.535            | 0.889 |
| IDH     | <0.001         | 6.641 | 0.048            | 0.449 | <0.001         | 3.512 | 0.219            | 0.559 | 0.044          | 2.937 | 0.231            | 0.359 | /              | /     | /                | /     |
| 1p19q   | <0.001         | 2.654 | 0.646            | 1.139 | <0.001         | 5.583 | <0.001           | 4.767 | 0.049          | 3.589 | 0.019            | 5.913 | /              | /     | /                | /     |
| MGMT    | <0.001         | 2.654 | 0.964            | 1.011 | 0.128          | 1.484 | 0.238            | 1.394 | 0.182          | 2.082 | 0.677            | 1.403 | /              | /     | /                | /     |
| Score   | <0.001         | 1.007 | <0.001           | 1.009 | <0.001         | 1.004 | 0.016            | 1.003 | 0.001          | 1.006 | 0.007            | 1.007 | <0.001         | 1.003 | <0.001           | 1.003 |

**Supplementary Table 2** | Univariate and multivariate Cox regression analysis in TCGA, CGGA-seq, CGGA-array database and GSE108474.



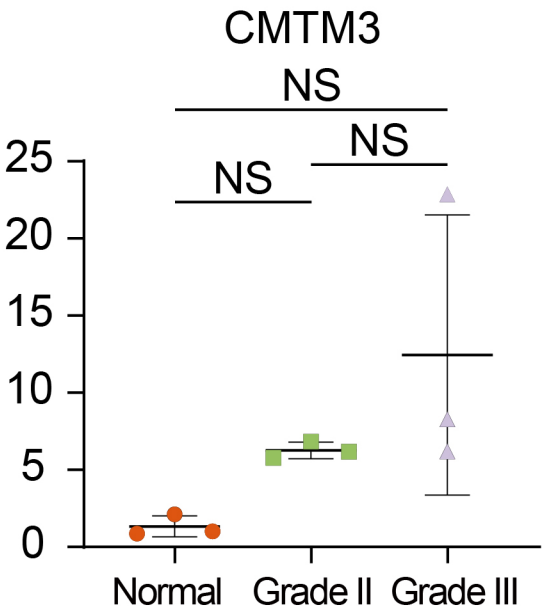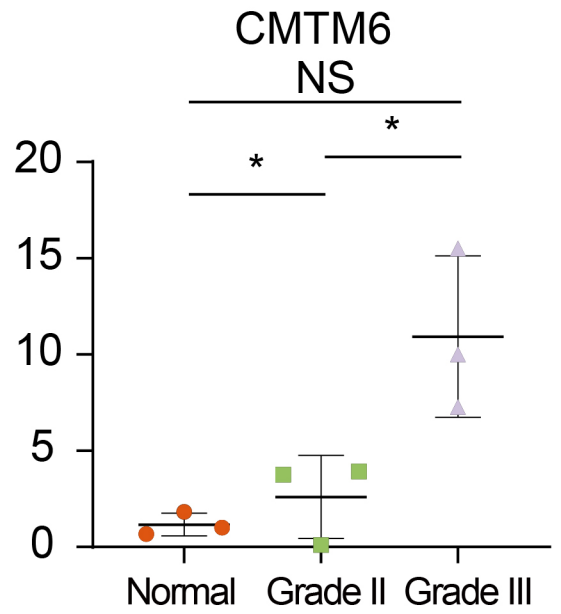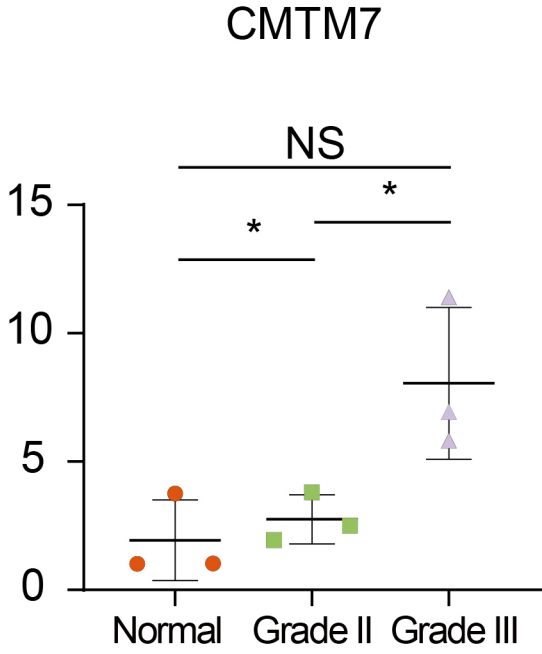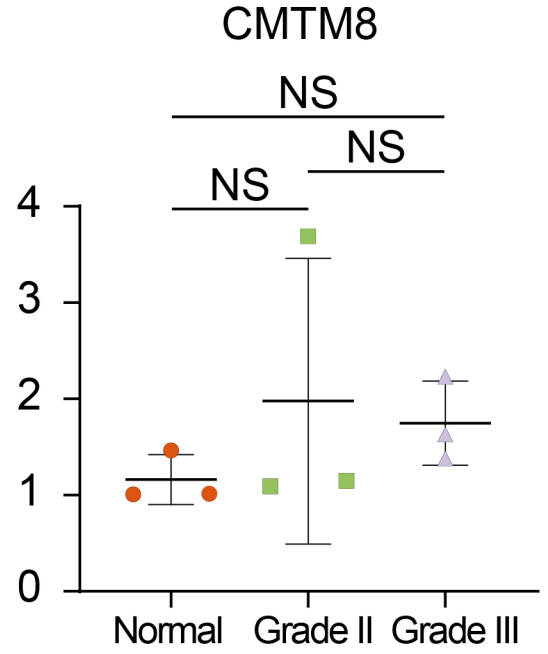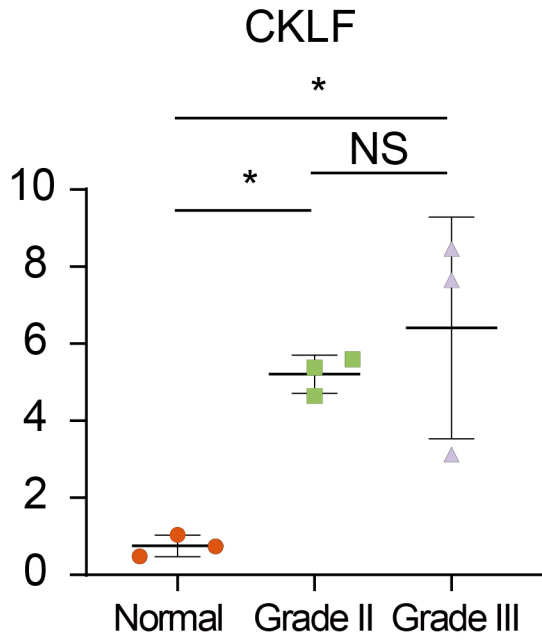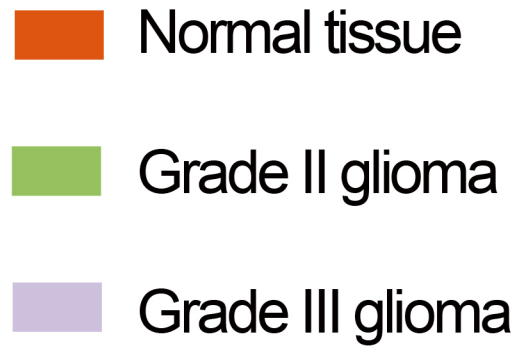

### CGGA325 dataset

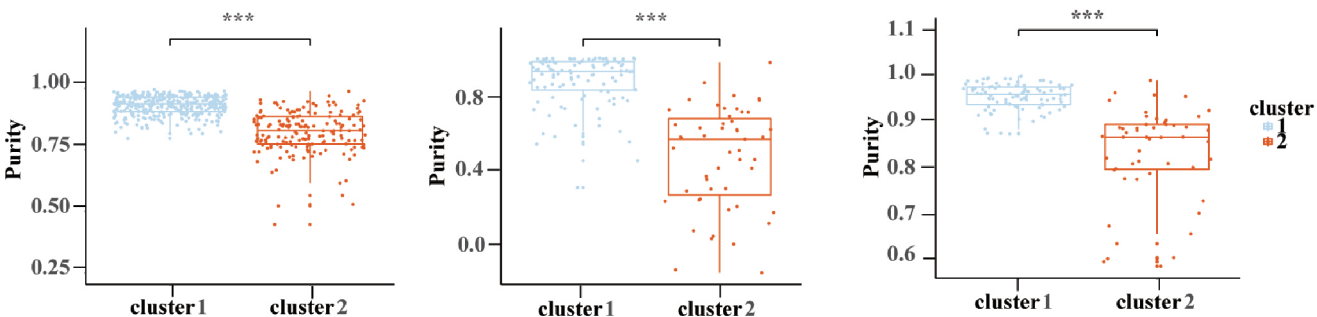

# B

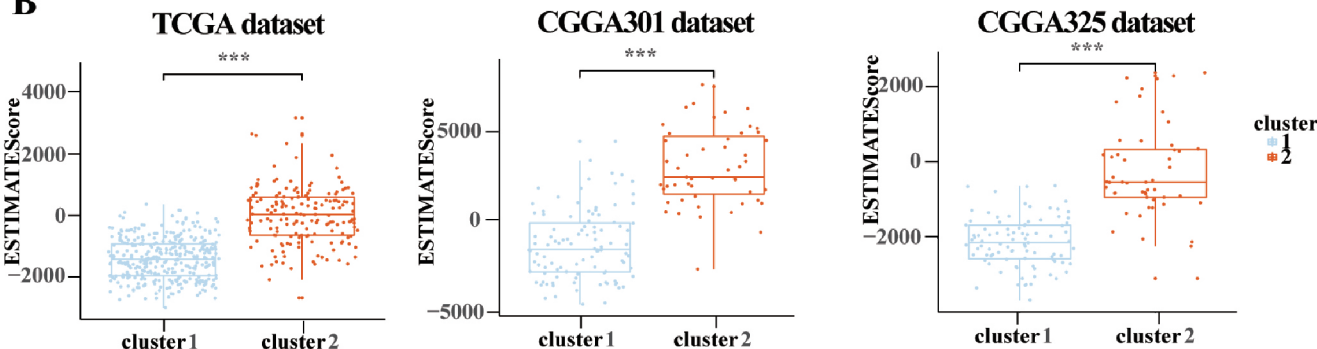

C

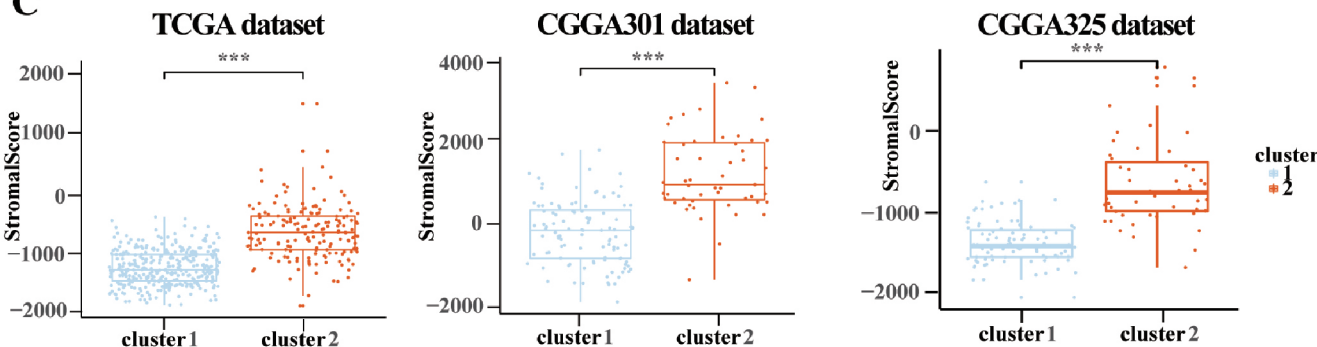

D

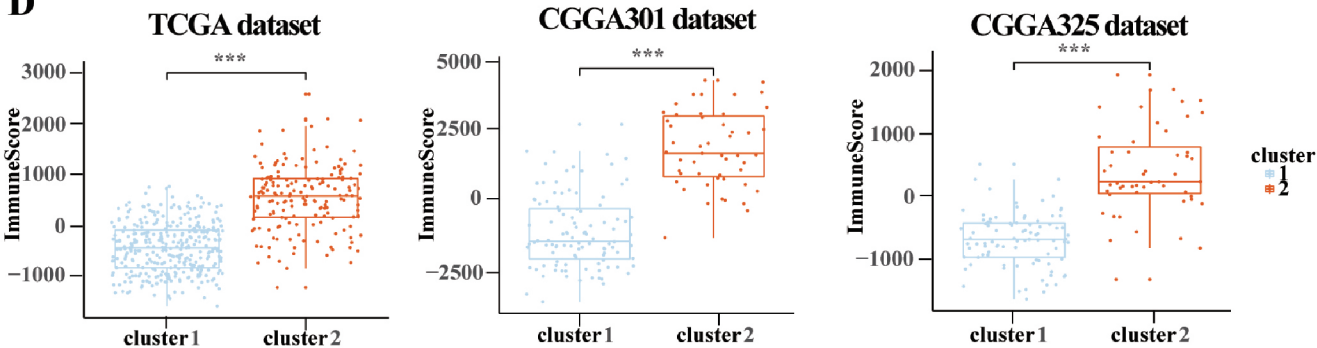

A

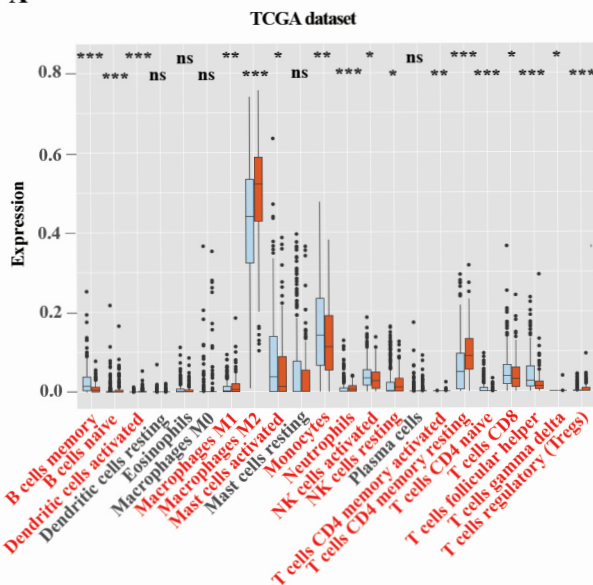

C

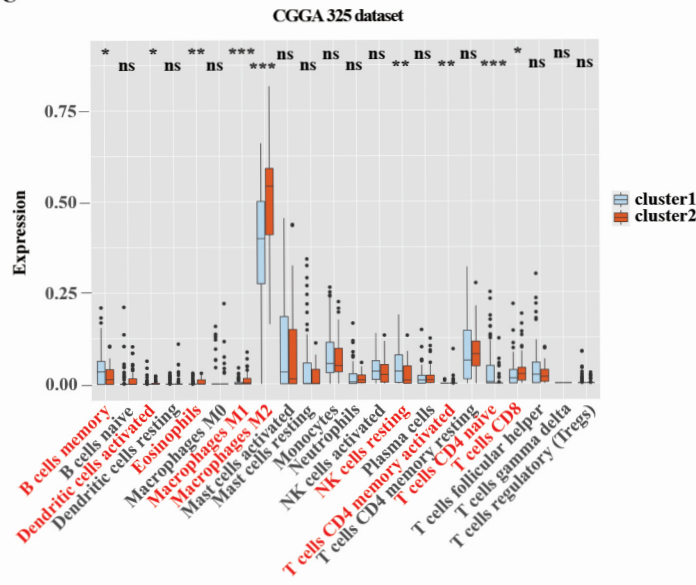

B

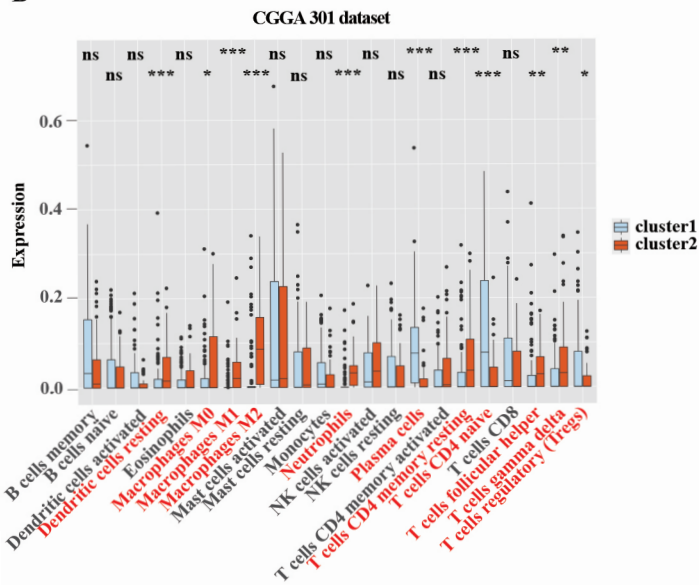

A

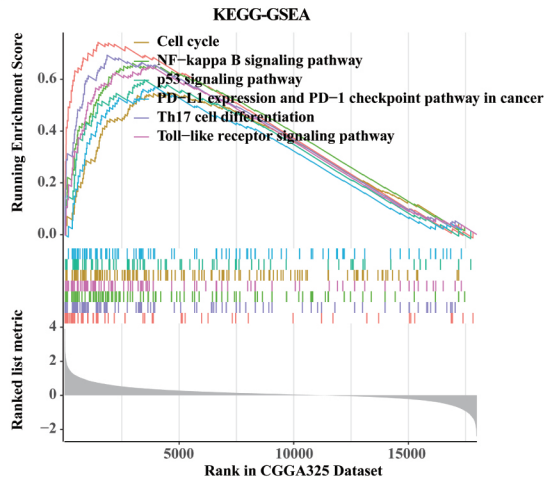

B

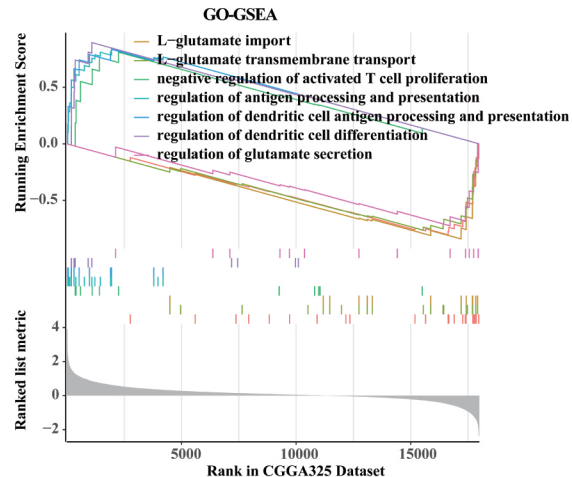

C

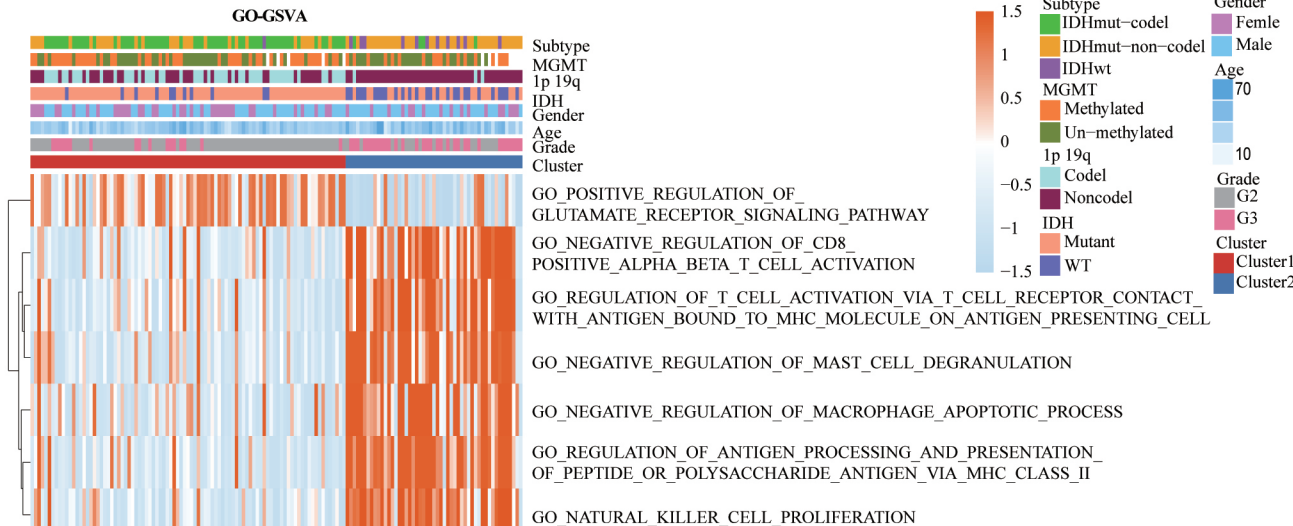

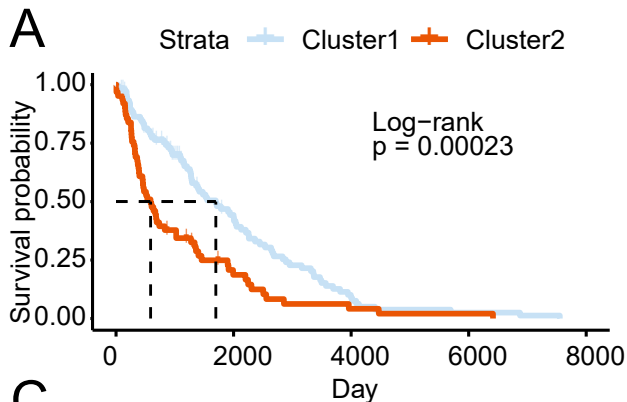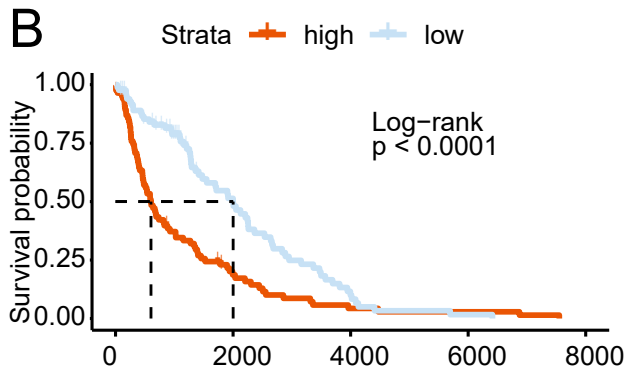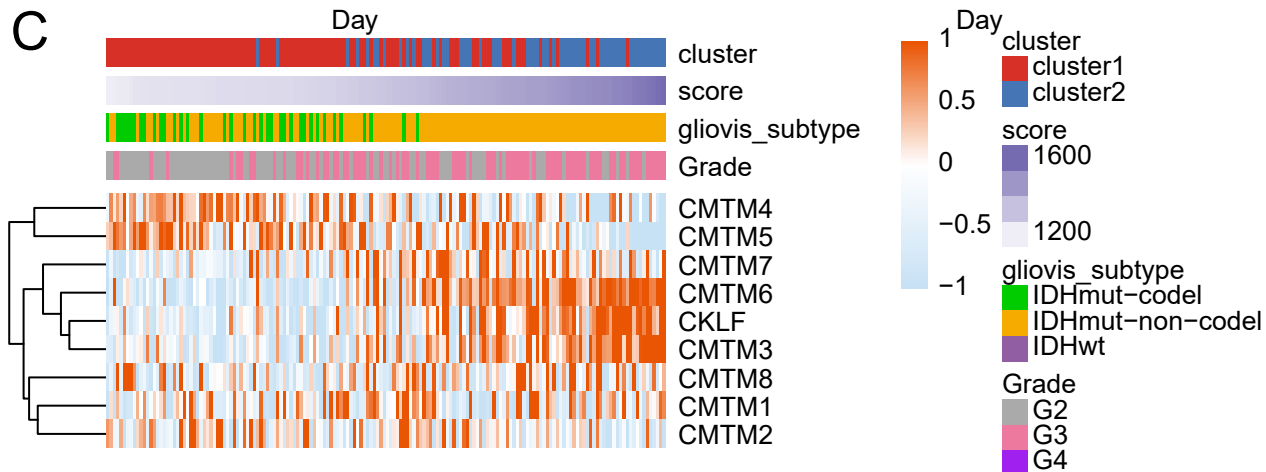

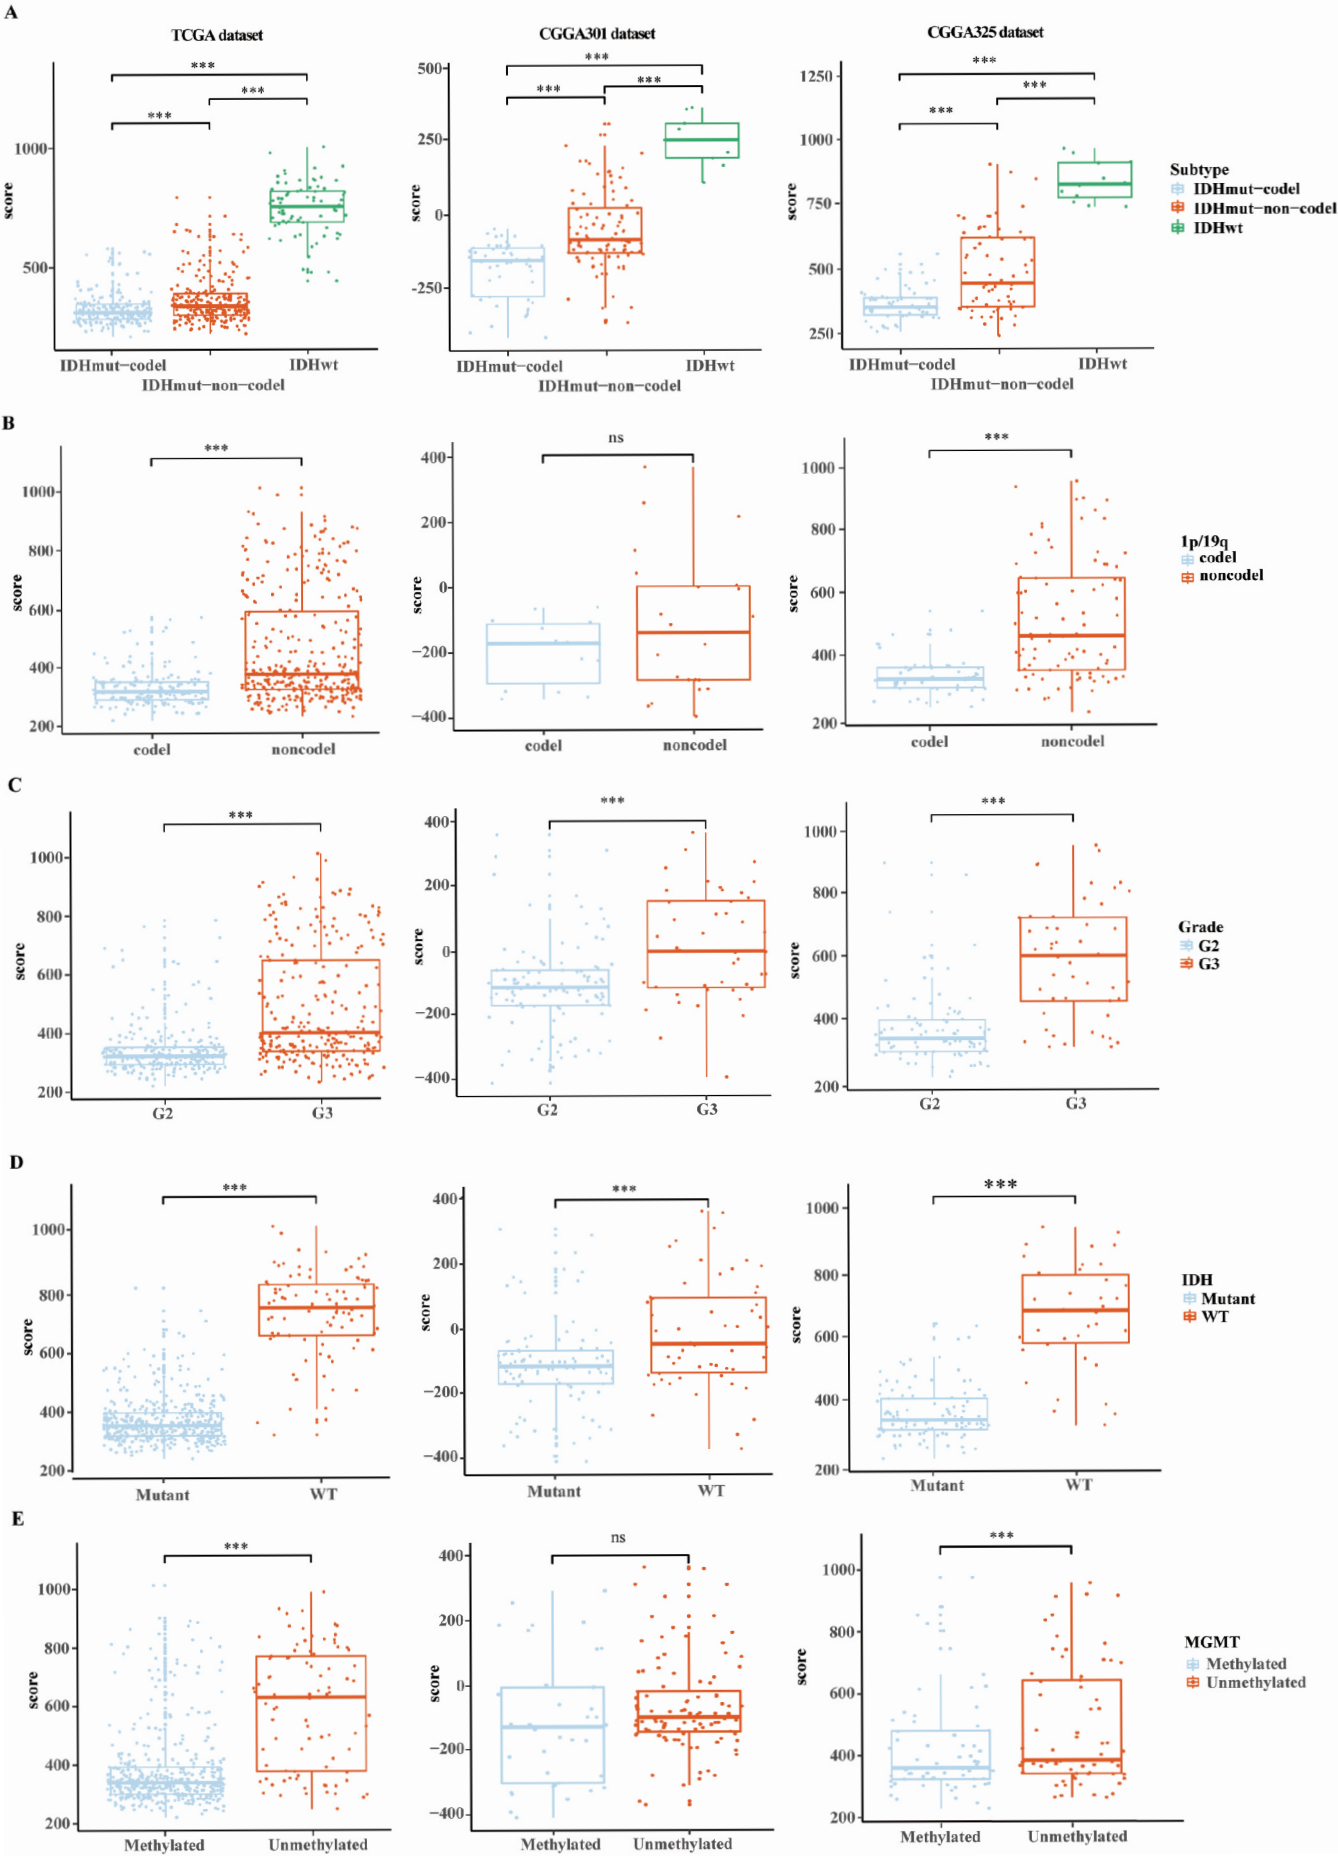

A

## KEGG-GSEA

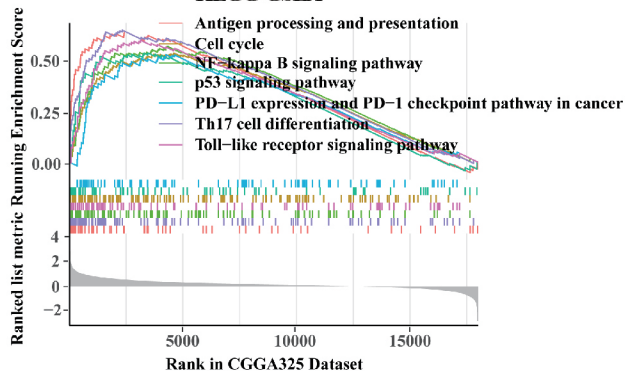

B

## GO-GSEA

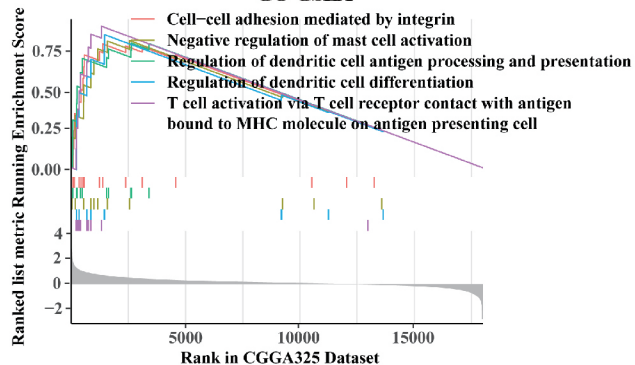

C

## KEGG-GSVA

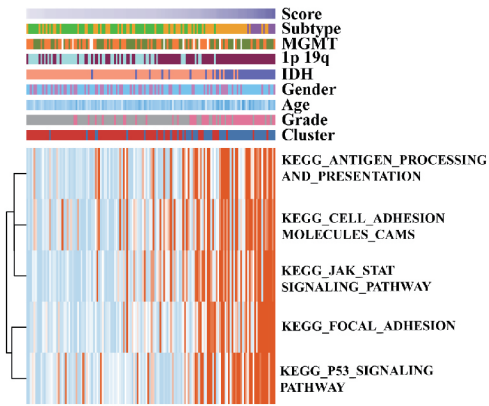

D

## GO-GSVA

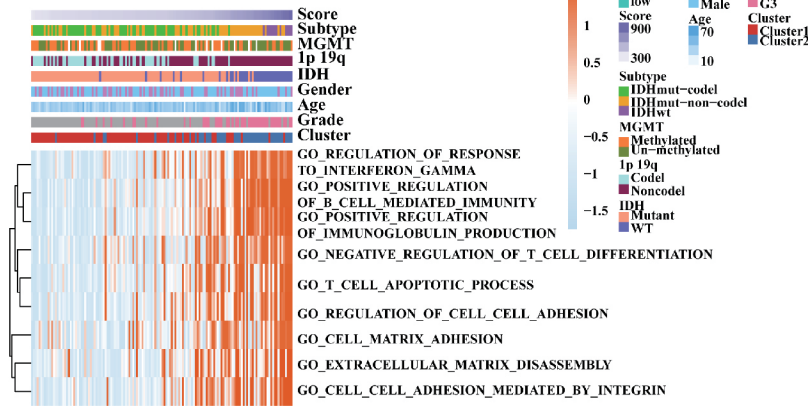

Supplement: Presentation_1.pdf [file Presentation_1.pdf]
